# Supplementary material for: Phylogeny and Genetic Divergence among Sorghum Mosaic Virus Isolates Infecting Sugarcane
Source: MDPI journal article supplement (doi:10.3390/plants12213759), 2023-11-02
Supplement: s1 [file s1]

**Table S1.** Percent identities (%) of nucleotide (low-left) and amino acid (up-right) sequences of SrMV *CP* within and between different geographical origins <sup>a</sup>.

| Geographical origins | Asia (n = 296)      | South America (n = 10) |
|----------------------|---------------------|------------------------|
| Asia                 | 72.0~100 (74.9~100) | 74.9~100               |
| South America        | 71.3~100            | 95.5~100 (95.8~100)    |

<sup>a</sup> Amino acid sequence identities (%) of SrMV *CP* within geographical origins are shown in parentheses.

**Table S2.** Percent identities (%) of nucleotide (low-left) and amino acid (up-right) sequences of SrMV *CP* within and between host types <sup>a</sup>.

| Host types      | Modern cultivar (n = 288) | Chewing cane (n = 18) |
|-----------------|---------------------------|-----------------------|
| Modern cultivar | 71.3~100 (74.9~100)       | 74.9~100              |
| Chewing cane    | 71.3~100                  | 74.8~99.8 (85.9~100)  |

<sup>a</sup> Amino acid sequence identities (%) of SrMV *CP* within host types are shown in parentheses.

**Table S3.** Information of sequences from sorghum mosaic virus (SrMV) isolates worldwide.

| No. | SrMV group | Isolate | NCBI accession no. | Region/Country           | Host            | Reference        |
|-----|------------|---------|--------------------|--------------------------|-----------------|------------------|
| 1   | A          | FJFZ012 | MZ419570           | FuZhou, Fujian, China    | Chewing cane    | He et al. (2022) |
| 2   | A          | FJFZ014 | MZ419571           | FuZhou, Fujian, China    | Chewing cane    | He et al. (2022) |
| 3   | D          | FJFZ024 | MZ419572           | FuZhou, Fujian, China    | Modern cultivar | He et al. (2022) |
| 4   | A          | FJFZ026 | MZ419573           | FuZhou, Fujian, China    | Modern cultivar | He et al. (2022) |
| 5   | D          | FJFZ028 | MZ419574           | FuZhou, Fujian, China    | Modern cultivar | He et al. (2022) |
| 6   | E          | FJFZ030 | MZ419575           | FuZhou, Fujian, China    | Modern cultivar | He et al. (2022) |
| 7   | D          | FJFZ035 | MZ419576           | FuZhou, Fujian, China    | Modern cultivar | He et al. (2022) |
| 8   | C          | FJFZ036 | MZ419577           | FuZhou, Fujian, China    | Modern cultivar | He et al. (2022) |
| 9   | D          | FJFZ037 | MZ419578           | FuZhou, Fujian, China    | Modern cultivar | He et al. (2022) |
| 10  | D          | FJFZ038 | MZ419579           | FuZhou, Fujian, China    | Modern cultivar | He et al. (2022) |
| 11  | B          | FJFZ041 | MZ419580           | FuZhou, Fujian, China    | Modern cultivar | He et al. (2022) |
| 12  | C          | FJFZ042 | MZ419581           | FuZhou, Fujian, China    | Modern cultivar | He et al. (2022) |
| 13  | D          | FJFZ045 | MZ419582           | FuZhou, Fujian, China    | Modern cultivar | He et al. (2022) |
| 14  | A          | FJFZ061 | MZ419583           | FuZhou, Fujian, China    | Modern cultivar | He et al. (2022) |
| 15  | D          | FJFZ064 | MZ419584           | FuZhou, Fujian, China    | Modern cultivar | He et al. (2022) |
| 16  | E          | FJSX017 | MZ419585           | FuZhou, Fujian, China    | Modern cultivar | He et al. (2022) |
| 17  | E          | FJSX023 | MZ419586           | FuZhou, Fujian, China    | Modern cultivar | He et al. (2022) |
| 18  | E          | FJSX026 | MZ419587           | FuZhou, Fujian, China    | Modern cultivar | He et al. (2022) |
| 19  | E          | FJSX027 | MZ419588           | FuZhou, Fujian, China    | Modern cultivar | He et al. (2022) |
| 20  | D          | FJZZ011 | MZ419589           | Zhangzhou, Fujian, China | Modern cultivar | He et al. (2022) |
| 21  | D          | GDZJ203 | MZ419590           | Zhangzhou, Fujian, China | Modern cultivar | He et al. (2022) |
| 22  | A          | GXBS060 | MZ419591           | Baise, Guangxi, China    | Modern cultivar | He et al. (2022) |
| 23  | A          | GXBS061 | MZ419592           | Baise, Guangxi, China    | Modern cultivar | He et al. (2022) |

|    |   |          |          |                               |                 |                  |
|----|---|----------|----------|-------------------------------|-----------------|------------------|
| 24 | A | GXBS070  | MZ419593 | Baise, Guangxi, China         | Modern cultivar | He et al. (2022) |
| 25 | E | GXBS072  | MZ419594 | Baise, Guangxi, China         | Modern cultivar | He et al. (2022) |
| 26 | A | GXBS074  | MZ419595 | Baise, Guangxi, China         | Modern cultivar | He et al. (2022) |
| 27 | A | GXCZ036  | MZ419596 | Chongzuo, Guangxi, China      | Modern cultivar | He et al. (2022) |
| 28 | E | GXFCG021 | MZ419597 | Fangchenggang, Guangxi, China | Modern cultivar | He et al. (2022) |
| 29 | E | GXFCG048 | MZ419598 | Fangchenggang, Guangxi, China | Modern cultivar | He et al. (2022) |
| 30 | A | GXLB044  | MZ419599 | Laibin, Guangxi, China        | Modern cultivar | He et al. (2022) |
| 31 | A | GXLB045  | MZ419600 | Laibin, Guangxi, China        | Modern cultivar | He et al. (2022) |
| 32 | A | GXLB047  | MZ419601 | Laibin, Guangxi, China        | Modern cultivar | He et al. (2022) |
| 33 | D | GXLZ001  | MZ419602 | Laibin, Guangxi, China        | Modern cultivar | He et al. (2022) |
| 34 | E | GXLZ002  | MZ419603 | Laibin, Guangxi, China        | Modern cultivar | He et al. (2022) |
| 35 | E | GXLZ003  | MZ419604 | Laibin, Guangxi, China        | Modern cultivar | He et al. (2022) |
| 36 | D | GXNN075  | MZ419605 | Nanning, Guangxi, China       | Modern cultivar | He et al. (2022) |
| 37 | D | GZAL001  | MZ419606 | Anlong, Guizhou, China        | Modern cultivar | He et al. (2022) |
| 38 | D | GZAL002  | MZ419607 | Anlong, Guizhou, China        | Modern cultivar | He et al. (2022) |
| 39 | D | GZAL005  | MZ419608 | Anlong, Guizhou, China        | Modern cultivar | He et al. (2022) |
| 40 | D | GZCH001  | MZ419609 | Ceheng, Guizhou, China        | Modern cultivar | He et al. (2022) |
| 41 | D | GZCH002  | MZ419610 | Ceheng, Guizhou, China        | Modern cultivar | He et al. (2022) |
| 42 | A | GZCH004  | MZ419611 | Ceheng, Guizhou, China        | Modern cultivar | He et al. (2022) |
| 43 | D | GZCH005  | MZ419612 | Ceheng, Guizhou, China        | Modern cultivar | He et al. (2022) |
| 44 | D | GZCH006  | MZ419613 | Ceheng, Guizhou, China        | Modern cultivar | He et al. (2022) |
| 45 | D | GZCH007  | MZ419614 | Ceheng, Guizhou, China        | Modern cultivar | He et al. (2022) |
| 46 | D | GZCH008  | MZ419615 | Ceheng, Guizhou, China        | Modern cultivar | He et al. (2022) |
| 47 | D | GZCH009  | MZ419616 | Ceheng, Guizhou, China        | Modern cultivar | He et al. (2022) |
| 48 | D | GZCH010  | MZ419617 | Ceheng, Guizhou, China        | Modern cultivar | He et al. (2022) |

|    |   |         |          |                        |                 |                  |
|----|---|---------|----------|------------------------|-----------------|------------------|
| 49 | D | GZCH011 | MZ419618 | Ceheng, Guizhou, China | Modern cultivar | He et al. (2022) |
| 50 | D | GZCH012 | MZ419619 | Ceheng, Guizhou, China | Modern cultivar | He et al. (2022) |
| 51 | D | GZCH015 | MZ419620 | Ceheng, Guizhou, China | Modern cultivar | He et al. (2022) |
| 52 | D | GZCH019 | MZ419621 | Ceheng, Guizhou, China | Modern cultivar | He et al. (2022) |
| 53 | D | GZCH022 | MZ419622 | Ceheng, Guizhou, China | Modern cultivar | He et al. (2022) |
| 54 | D | GZCH023 | MZ419623 | Ceheng, Guizhou, China | Modern cultivar | He et al. (2022) |
| 55 | D | GZCH024 | MZ419624 | Ceheng, Guizhou, China | Modern cultivar | He et al. (2022) |
| 56 | A | GZCH025 | MZ419625 | Ceheng, Guizhou, China | Modern cultivar | He et al. (2022) |
| 57 | B | GZCH031 | MZ419626 | Ceheng, Guizhou, China | Modern cultivar | He et al. (2022) |
| 58 | D | GZCH032 | MZ419627 | Ceheng, Guizhou, China | Modern cultivar | He et al. (2022) |
| 59 | A | GZCH033 | MZ419628 | Ceheng, Guizhou, China | Modern cultivar | He et al. (2022) |
| 60 | D | GZCH034 | MZ419629 | Ceheng, Guizhou, China | Modern cultivar | He et al. (2022) |
| 61 | A | GZCH035 | MZ419630 | Ceheng, Guizhou, China | Modern cultivar | He et al. (2022) |
| 62 | D | GZCH036 | MZ419631 | Ceheng, Guizhou, China | Modern cultivar | He et al. (2022) |
| 63 | D | GZCH037 | MZ419632 | Ceheng, Guizhou, China | Modern cultivar | He et al. (2022) |
| 64 | D | GZCH038 | MZ419633 | Ceheng, Guizhou, China | Modern cultivar | He et al. (2022) |
| 65 | D | GZWM002 | MZ419634 | Wangmo, Guizhou, China | Modern cultivar | He et al. (2022) |
| 66 | A | GZWM003 | MZ419635 | Wangmo, Guizhou, China | Modern cultivar | He et al. (2022) |
| 67 | A | GZWM004 | MZ419636 | Wangmo, Guizhou, China | Modern cultivar | He et al. (2022) |
| 68 | A | GZWM005 | MZ419637 | Wangmo, Guizhou, China | Modern cultivar | He et al. (2022) |
| 69 | A | GZWM006 | MZ419638 | Wangmo, Guizhou, China | Modern cultivar | He et al. (2022) |
| 70 | A | GZWM008 | MZ419639 | Wangmo, Guizhou, China | Modern cultivar | He et al. (2022) |
| 71 | A | GZWM009 | MZ419640 | Wangmo, Guizhou, China | Modern cultivar | He et al. (2022) |
| 72 | A | GZWM010 | MZ419641 | Wangmo, Guizhou, China | Modern cultivar | He et al. (2022) |
| 73 | A | GZWM011 | MZ419642 | Wangmo, Guizhou, China | Modern cultivar | He et al. (2022) |

|    |   |         |          |                        |                 |                  |
|----|---|---------|----------|------------------------|-----------------|------------------|
| 74 | A | GZWM012 | MZ419643 | Wangmo, Guizhou, China | Modern cultivar | He et al. (2022) |
| 75 | A | GZWM015 | MZ419644 | Wangmo, Guizhou, China | Modern cultivar | He et al. (2022) |
| 76 | A | GZWM016 | MZ419645 | Wangmo, Guizhou, China | Modern cultivar | He et al. (2022) |
| 77 | A | GZWM021 | MZ419646 | Wangmo, Guizhou, China | Modern cultivar | He et al. (2022) |
| 78 | A | GZWM022 | MZ419647 | Wangmo, Guizhou, China | Modern cultivar | He et al. (2022) |
| 79 | D | GZWM023 | MZ419648 | Wangmo, Guizhou, China | Modern cultivar | He et al. (2022) |
| 80 | E | GZWM025 | MZ419649 | Wangmo, Guizhou, China | Modern cultivar | He et al. (2022) |
| 81 | D | GZWM027 | MZ419650 | Wangmo, Guizhou, China | Modern cultivar | He et al. (2022) |
| 82 | D | GZWM028 | MZ419651 | Wangmo, Guizhou, China | Modern cultivar | He et al. (2022) |
| 83 | D | GZWM030 | MZ419652 | Wangmo, Guizhou, China | Modern cultivar | He et al. (2022) |
| 84 | A | GZWM034 | MZ419653 | Wangmo, Guizhou, China | Modern cultivar | He et al. (2022) |
| 85 | D | GZWM035 | MZ419654 | Wangmo, Guizhou, China | Modern cultivar | He et al. (2022) |
| 86 | A | GZWM036 | MZ419655 | Wangmo, Guizhou, China | Modern cultivar | He et al. (2022) |
| 87 | A | GZWM037 | MZ419656 | Wangmo, Guizhou, China | Modern cultivar | He et al. (2022) |
| 88 | A | GZWM038 | MZ419657 | Wangmo, Guizhou, China | Modern cultivar | He et al. (2022) |
| 89 | A | GZWM039 | MZ419658 | Wangmo, Guizhou, China | Modern cultivar | He et al. (2022) |
| 90 | D | GZWM040 | MZ419659 | Wangmo, Guizhou, China | Modern cultivar | He et al. (2022) |
| 91 | A | GZWM041 | MZ419660 | Wangmo, Guizhou, China | Modern cultivar | He et al. (2022) |
| 92 | A | GZWM042 | MZ419661 | Wangmo, Guizhou, China | Modern cultivar | He et al. (2022) |
| 93 | E | GZWM043 | MZ419662 | Wangmo, Guizhou, China | Modern cultivar | He et al. (2022) |
| 94 | A | GZWM044 | MZ419663 | Wangmo, Guizhou, China | Modern cultivar | He et al. (2022) |
| 95 | E | GZWM045 | MZ419664 | Wangmo, Guizhou, China | Modern cultivar | He et al. (2022) |
| 96 | E | GZWM046 | MZ419665 | Wangmo, Guizhou, China | Modern cultivar | He et al. (2022) |
| 97 | D | GZWM047 | MZ419666 | Wangmo, Guizhou, China | Modern cultivar | He et al. (2022) |
| 98 | A | GZWM048 | MZ419667 | Wangmo, Guizhou, China | Modern cultivar | He et al. (2022) |

|     |   |         |          |                        |                 |                  |
|-----|---|---------|----------|------------------------|-----------------|------------------|
| 99  | A | GZWM049 | MZ419668 | Wangmo, Guizhou, China | Modern cultivar | He et al. (2022) |
| 100 | A | GZWM050 | MZ419669 | Wangmo, Guizhou, China | Modern cultivar | He et al. (2022) |
| 101 | D | GZWM051 | MZ419670 | Wangmo, Guizhou, China | Modern cultivar | He et al. (2022) |
| 102 | D | GZWM052 | MZ419671 | Wangmo, Guizhou, China | Modern cultivar | He et al. (2022) |
| 103 | A | GZWM053 | MZ419672 | Wangmo, Guizhou, China | Modern cultivar | He et al. (2022) |
| 104 | E | GZWM054 | MZ419673 | Wangmo, Guizhou, China | Modern cultivar | He et al. (2022) |
| 105 | A | GZWM055 | MZ419674 | Wangmo, Guizhou, China | Modern cultivar | He et al. (2022) |
| 106 | A | GZWM056 | MZ419675 | Wangmo, Guizhou, China | Modern cultivar | He et al. (2022) |
| 107 | E | GZWM057 | MZ419676 | Wangmo, Guizhou, China | Modern cultivar | He et al. (2022) |
| 108 | A | GZWM058 | MZ419677 | Wangmo, Guizhou, China | Modern cultivar | He et al. (2022) |
| 109 | A | GZWM059 | MZ419678 | Wangmo, Guizhou, China | Modern cultivar | He et al. (2022) |
| 110 | A | GZWM060 | MZ419679 | Wangmo, Guizhou, China | Modern cultivar | He et al. (2022) |
| 111 | A | GZWM062 | MZ419680 | Wangmo, Guizhou, China | Modern cultivar | He et al. (2022) |
| 112 | A | GZWM063 | MZ419681 | Wangmo, Guizhou, China | Modern cultivar | He et al. (2022) |
| 113 | A | GZXY002 | MZ419682 | Xingyi, Guizhou, China | Modern cultivar | He et al. (2022) |
| 114 | D | GZXY003 | MZ419683 | Xingyi, Guizhou, China | Modern cultivar | He et al. (2022) |
| 115 | D | GZXY005 | MZ419684 | Xingyi, Guizhou, China | Modern cultivar | He et al. (2022) |
| 116 | D | GZXY006 | MZ419685 | Xingyi, Guizhou, China | Modern cultivar | He et al. (2022) |
| 117 | A | GZXY007 | MZ419686 | Xingyi, Guizhou, China | Modern cultivar | He et al. (2022) |
| 118 | A | GZXY008 | MZ419687 | Xingyi, Guizhou, China | Modern cultivar | He et al. (2022) |
| 119 | A | GZXY011 | MZ419688 | Xingyi, Guizhou, China | Modern cultivar | He et al. (2022) |
| 120 | A | GZXY012 | MZ419689 | Xingyi, Guizhou, China | Modern cultivar | He et al. (2022) |
| 121 | A | GZXY018 | MZ419690 | Xingyi, Guizhou, China | Modern cultivar | He et al. (2022) |
| 122 | B | GZXY023 | MZ419691 | Xingyi, Guizhou, China | Modern cultivar | He et al. (2022) |
| 123 | A | GZXY026 | MZ419692 | Xingyi, Guizhou, China | Modern cultivar | He et al. (2022) |

|     |   |         |          |                        |                 |                  |
|-----|---|---------|----------|------------------------|-----------------|------------------|
| 124 | A | GZXY028 | MZ419693 | Xingyi, Guizhou, China | Modern cultivar | He et al. (2022) |
| 125 | A | GZXY030 | MZ419694 | Xingyi, Guizhou, China | Modern cultivar | He et al. (2022) |
| 126 | A | GZXY031 | MZ419695 | Xingyi, Guizhou, China | Modern cultivar | He et al. (2022) |
| 127 | A | GZXY032 | MZ419696 | Xingyi, Guizhou, China | Modern cultivar | He et al. (2022) |
| 128 | A | GZXY033 | MZ419697 | Xingyi, Guizhou, China | Modern cultivar | He et al. (2022) |
| 129 | A | GZXY034 | MZ419698 | Xingyi, Guizhou, China | Modern cultivar | He et al. (2022) |
| 130 | D | GZXY035 | MZ419699 | Xingyi, Guizhou, China | Modern cultivar | He et al. (2022) |
| 131 | D | GZXY036 | MZ419700 | Xingyi, Guizhou, China | Modern cultivar | He et al. (2022) |
| 132 | D | GZXY037 | MZ419701 | Xingyi, Guizhou, China | Modern cultivar | He et al. (2022) |
| 133 | D | GZXY041 | MZ419702 | Xingyi, Guizhou, China | Modern cultivar | He et al. (2022) |
| 134 | D | GZXY042 | MZ419703 | Xingyi, Guizhou, China | Modern cultivar | He et al. (2022) |
| 135 | D | GZXY044 | MZ419704 | Xingyi, Guizhou, China | Modern cultivar | He et al. (2022) |
| 136 | D | GZXY045 | MZ419705 | Xingyi, Guizhou, China | Modern cultivar | He et al. (2022) |
| 137 | D | GZXY046 | MZ419706 | Xingyi, Guizhou, China | Modern cultivar | He et al. (2022) |
| 138 | D | GZXY047 | MZ419707 | Xingyi, Guizhou, China | Modern cultivar | He et al. (2022) |
| 139 | A | GZXY051 | MZ419708 | Xingyi, Guizhou, China | Modern cultivar | He et al. (2022) |
| 140 | D | GZXY052 | MZ419709 | Xingyi, Guizhou, China | Modern cultivar | He et al. (2022) |
| 141 | A | GZXY053 | MZ419710 | Xingyi, Guizhou, China | Modern cultivar | He et al. (2022) |
| 142 | D | GZXY061 | MZ419711 | Xingyi, Guizhou, China | Modern cultivar | He et al. (2022) |
| 143 | D | GZXY062 | MZ419712 | Xingyi, Guizhou, China | Modern cultivar | He et al. (2022) |
| 144 | A | HNSY002 | MZ419713 | Sanya, Hainan, China   | Modern cultivar | He et al. (2022) |
| 145 | A | HNSY003 | MZ419714 | Sanya, Hainan, China   | Modern cultivar | He et al. (2022) |
| 146 | D | HNSY005 | MZ419715 | Sanya, Hainan, China   | Modern cultivar | He et al. (2022) |
| 147 | D | HNSY007 | MZ419716 | Sanya, Hainan, China   | Modern cultivar | He et al. (2022) |
| 148 | D | HNSY009 | MZ419717 | Sanya, Hainan, China   | Modern cultivar | He et al. (2022) |

|     |   |          |          |                          |                 |                  |
|-----|---|----------|----------|--------------------------|-----------------|------------------|
| 149 | A | HNSY010  | MZ419718 | Sanya, Hainan, China     | Modern cultivar | He et al. (2022) |
| 150 | E | HNSY014  | MZ419719 | Sanya, Hainan, China     | Modern cultivar | He et al. (2022) |
| 151 | A | HNSY015  | MZ419720 | Sanya, Hainan, China     | Modern cultivar | He et al. (2022) |
| 152 | B | HNWZS001 | MZ419721 | Wuzhishan, Hainan, China | Modern cultivar | He et al. (2022) |
| 153 | B | HNWZS003 | MZ419722 | Wuzhishan, Hainan, China | Modern cultivar | He et al. (2022) |
| 154 | B | HNWZS004 | MZ419723 | Wuzhishan, Hainan, China | Modern cultivar | He et al. (2022) |
| 155 | C | HNWZS007 | MZ419724 | Wuzhishan, Hainan, China | Modern cultivar | He et al. (2022) |
| 156 | A | HNWZS009 | MZ419725 | Wuzhishan, Hainan, China | Modern cultivar | He et al. (2022) |
| 157 | A | HNWZS010 | MZ419726 | Wuzhishan, Hainan, China | Modern cultivar | He et al. (2022) |
| 158 | D | HNWZS014 | MZ419727 | Wuzhishan, Hainan, China | Modern cultivar | He et al. (2022) |
| 159 | B | HNWZS016 | MZ419728 | Wuzhishan, Hainan, China | Modern cultivar | He et al. (2022) |
| 160 | D | HNWZS017 | MZ419729 | Wuzhishan, Hainan, China | Modern cultivar | He et al. (2022) |
| 161 | A | HNWZS025 | MZ419730 | Wuzhishan, Hainan, China | Modern cultivar | He et al. (2022) |
| 162 | B | HNWZS027 | MZ419731 | Wuzhishan, Hainan, China | Modern cultivar | He et al. (2022) |
| 163 | A | HNWZS029 | MZ419732 | Wuzhishan, Hainan, China | Modern cultivar | He et al. (2022) |
| 164 | A | HNWZS031 | MZ419733 | Wuzhishan, Hainan, China | Modern cultivar | He et al. (2022) |
| 165 | A | HNWZS032 | MZ419734 | Wuzhishan, Hainan, China | Modern cultivar | He et al. (2022) |
| 166 | A | HNWZS033 | MZ419735 | Wuzhishan, Hainan, China | Modern cultivar | He et al. (2022) |
| 167 | D | HNWZS034 | MZ419736 | Wuzhishan, Hainan, China | Modern cultivar | He et al. (2022) |
| 168 | A | HNWZS038 | MZ419737 | Wuzhishan, Hainan, China | Modern cultivar | He et al. (2022) |
| 169 | B | HNWZS039 | MZ419738 | Wuzhishan, Hainan, China | Modern cultivar | He et al. (2022) |
| 170 | B | HNWZS040 | MZ419739 | Wuzhishan, Hainan, China | Modern cultivar | He et al. (2022) |
| 171 | B | HNWZS041 | MZ419740 | Wuzhishan, Hainan, China | Modern cultivar | He et al. (2022) |
| 172 | A | SCJK001  | MZ419741 | Neijiang, Sichuan, China | Modern cultivar | He et al. (2022) |
| 173 | A | SCJK002  | MZ419742 | Neijiang, Sichuan, China | Modern cultivar | He et al. (2022) |



|     |   |         |          |                          |                 |                  |
|-----|---|---------|----------|--------------------------|-----------------|------------------|
| 174 | D | SCJK003 | MZ419743 | Neijiang, Sichuan, China | Modern cultivar | He et al. (2022) |
| 175 | D | SCJK004 | MZ419744 | Neijiang, Sichuan, China | Modern cultivar | He et al. (2022) |
| 176 | D | SCJK005 | MZ419745 | Neijiang, Sichuan, China | Modern cultivar | He et al. (2022) |
| 177 | D | SCJK006 | MZ419746 | Neijiang, Sichuan, China | Modern cultivar | He et al. (2022) |
| 178 | D | SCJK007 | MZ419747 | Neijiang, Sichuan, China | Modern cultivar | He et al. (2022) |
| 179 | A | SCJK011 | MZ419748 | Neijiang, Sichuan, China | Modern cultivar | He et al. (2022) |
| 180 | D | SCJK034 | MZ419749 | Neijiang, Sichuan, China | Modern cultivar | He et al. (2022) |
| 181 | D | SCJK035 | MZ419750 | Neijiang, Sichuan, China | Modern cultivar | He et al. (2022) |
| 182 | C | SCJK037 | MZ419751 | Neijiang, Sichuan, China | Modern cultivar | He et al. (2022) |
| 183 | D | SCJK038 | MZ419752 | Neijiang, Sichuan, China | Modern cultivar | He et al. (2022) |
| 184 | D | SCJK039 | MZ419753 | Neijiang, Sichuan, China | Modern cultivar | He et al. (2022) |
| 185 | D | SCJK040 | MZ419754 | Neijiang, Sichuan, China | Modern cultivar | He et al. (2022) |
| 186 | C | SCJK043 | MZ419755 | Neijiang, Sichuan, China | Modern cultivar | He et al. (2022) |
| 187 | C | SCMX074 | MZ419756 | Neijiang, Sichuan, China | Modern cultivar | He et al. (2022) |
| 188 | D | SCMX079 | MZ419757 | Neijiang, Sichuan, China | Modern cultivar | He et al. (2022) |
| 189 | D | SCMX083 | MZ419758 | Neijiang, Sichuan, China | Modern cultivar | He et al. (2022) |
| 190 | D | SCMX085 | MZ419759 | Neijiang, Sichuan, China | Modern cultivar | He et al. (2022) |
| 191 | D | SCMX096 | MZ419760 | Neijiang, Sichuan, China | Modern cultivar | He et al. (2022) |
| 192 | D | SCMX097 | MZ419761 | Neijiang, Sichuan, China | Modern cultivar | He et al. (2022) |
| 193 | B | SCSZ001 | MZ419762 | Neijiang, Sichuan, China | Modern cultivar | He et al. (2022) |
| 194 | A | SCSZ002 | MZ419763 | Neijiang, Sichuan, China | Modern cultivar | He et al. (2022) |
| 195 | D | SCSZ003 | MZ419764 | Neijiang, Sichuan, China | Modern cultivar | He et al. (2022) |
| 196 | A | SCSZ005 | MZ419765 | Neijiang, Sichuan, China | Modern cultivar | He et al. (2022) |
| 197 | A | SCSZ006 | MZ419766 | Neijiang, Sichuan, China | Modern cultivar | He et al. (2022) |
| 198 | A | SCSZ008 | MZ419767 | Neijiang, Sichuan, China | Modern cultivar | He et al. (2022) |

|     |   |         |          |                          |                 |                  |
|-----|---|---------|----------|--------------------------|-----------------|------------------|
| 199 | A | SCSZ009 | MZ419768 | Neijiang, Sichuan, China | Modern cultivar | He et al. (2022) |
| 200 | D | SCSZ010 | MZ419769 | Neijiang, Sichuan, China | Modern cultivar | He et al. (2022) |
| 201 | D | SCSZ011 | MZ419770 | Neijiang, Sichuan, China | Modern cultivar | He et al. (2022) |
| 202 | B | SCSZ012 | MZ419771 | Neijiang, Sichuan, China | Modern cultivar | He et al. (2022) |
| 203 | D | SCSZ013 | MZ419772 | Neijiang, Sichuan, China | Modern cultivar | He et al. (2022) |
| 204 | B | SCSZ014 | MZ419773 | Neijiang, Sichuan, China | Modern cultivar | He et al. (2022) |
| 205 | B | SCSZ015 | MZ419774 | Neijiang, Sichuan, China | Modern cultivar | He et al. (2022) |
| 206 | B | SCSZ016 | MZ419775 | Neijiang, Sichuan, China | Modern cultivar | He et al. (2022) |
| 207 | A | SCSZ017 | MZ419776 | Neijiang, Sichuan, China | Modern cultivar | He et al. (2022) |
| 208 | A | SCSZ019 | MZ419777 | Neijiang, Sichuan, China | Modern cultivar | He et al. (2022) |
| 209 | A | SCSZ020 | MZ419778 | Neijiang, Sichuan, China | Modern cultivar | He et al. (2022) |
| 210 | A | SCSZ021 | MZ419779 | Neijiang, Sichuan, China | Modern cultivar | He et al. (2022) |
| 211 | A | SCSZ022 | MZ419780 | Neijiang, Sichuan, China | Modern cultivar | He et al. (2022) |
| 212 | B | SCWY007 | MZ419781 | Neijiang, Sichuan, China | Modern cultivar | He et al. (2022) |
| 213 | C | SCWY008 | MZ419782 | Neijiang, Sichuan, China | Modern cultivar | He et al. (2022) |
| 214 | B | SCWY009 | MZ419783 | Neijiang, Sichuan, China | Modern cultivar | He et al. (2022) |
| 215 | B | SCWY010 | MZ419784 | Neijiang, Sichuan, China | Modern cultivar | He et al. (2022) |
| 216 | C | SCWY011 | MZ419785 | Neijiang, Sichuan, China | Modern cultivar | He et al. (2022) |
| 217 | B | SCWY012 | MZ419786 | Neijiang, Sichuan, China | Modern cultivar | He et al. (2022) |
| 218 | B | SCWY014 | MZ419787 | Neijiang, Sichuan, China | Modern cultivar | He et al. (2022) |
| 219 | C | SCZZ002 | MZ419788 | Neijiang, Sichuan, China | Modern cultivar | He et al. (2022) |
| 220 | D | SCZZ003 | MZ419789 | Neijiang, Sichuan, China | Modern cultivar | He et al. (2022) |
| 221 | D | SCZZ004 | MZ419790 | Neijiang, Sichuan, China | Modern cultivar | He et al. (2022) |
| 222 | C | SCZZ005 | MZ419791 | Neijiang, Sichuan, China | Modern cultivar | He et al. (2022) |
| 223 | D | SCZZ006 | MZ419792 | Neijiang, Sichuan, China | Modern cultivar | He et al. (2022) |

|     |   |         |          |                          |                 |                  |
|-----|---|---------|----------|--------------------------|-----------------|------------------|
| 224 | C | SCZZ007 | MZ419793 | Neijiang, Sichuan, China | Modern cultivar | He et al. (2022) |
| 225 | D | SCZZ008 | MZ419794 | Neijiang, Sichuan, China | Modern cultivar | He et al. (2022) |
| 226 | C | SCZZ010 | MZ419795 | Neijiang, Sichuan, China | Modern cultivar | He et al. (2022) |
| 227 | D | SCZZ011 | MZ419796 | Neijiang, Sichuan, China | Modern cultivar | He et al. (2022) |
| 228 | D | SCZZ012 | MZ419797 | Neijiang, Sichuan, China | Modern cultivar | He et al. (2022) |
| 229 | C | SCZZ013 | MZ419798 | Neijiang, Sichuan, China | Modern cultivar | He et al. (2022) |
| 230 | D | SCZZ014 | MZ419799 | Neijiang, Sichuan, China | Modern cultivar | He et al. (2022) |
| 231 | C | SCZZ015 | MZ419800 | Neijiang, Sichuan, China | Modern cultivar | He et al. (2022) |
| 232 | C | SCZZ016 | MZ419801 | Neijiang, Sichuan, China | Modern cultivar | He et al. (2022) |
| 233 | C | SCZZ017 | MZ419802 | Neijiang, Sichuan, China | Modern cultivar | He et al. (2022) |
| 234 | A | SCZZ018 | MZ419803 | Neijiang, Sichuan, China | Modern cultivar | He et al. (2022) |
| 235 | A | SCZZ019 | MZ419804 | Neijiang, Sichuan, China | Modern cultivar | He et al. (2022) |
| 236 | A | SCZZ020 | MZ419805 | Neijiang, Sichuan, China | Modern cultivar | He et al. (2022) |
| 237 | A | SCZZ021 | MZ419806 | Neijiang, Sichuan, China | Modern cultivar | He et al. (2022) |
| 238 | A | SCZZ022 | MZ419807 | Neijiang, Sichuan, China | Modern cultivar | He et al. (2022) |
| 239 | A | SCZZ023 | MZ419808 | Neijiang, Sichuan, China | Modern cultivar | He et al. (2022) |
| 240 | A | SCZZ024 | MZ419809 | Neijiang, Sichuan, China | Modern cultivar | He et al. (2022) |
| 241 | D | SCZZ026 | MZ419810 | Neijiang, Sichuan, China | Modern cultivar | He et al. (2022) |
| 242 | D | SCZZ027 | MZ419811 | Neijiang, Sichuan, China | Modern cultivar | He et al. (2022) |
| 243 | D | SCZZ028 | MZ419812 | Neijiang, Sichuan, China | Modern cultivar | He et al. (2022) |
| 244 | C | SCZZ029 | MZ419813 | Neijiang, Sichuan, China | Modern cultivar | He et al. (2022) |
| 245 | D | SCZZ030 | MZ419814 | Neijiang, Sichuan, China | Modern cultivar | He et al. (2022) |
| 246 | D | SCZZ031 | MZ419815 | Neijiang, Sichuan, China | Modern cultivar | He et al. (2022) |
| 247 | D | SCZZ032 | MZ419816 | Neijiang, Sichuan, China | Modern cultivar | He et al. (2022) |
| 248 | C | SCZZ033 | MZ419817 | Neijiang, Sichuan, China | Modern cultivar | He et al. (2022) |

|     |   |         |          |                           |                 |                    |
|-----|---|---------|----------|---------------------------|-----------------|--------------------|
| 249 | D | SCZZ034 | MZ419818 | Neijiang, Sichuan, China  | Modern cultivar | He et al. (2022)   |
| 250 | D | SCZZ036 | MZ419819 | Neijiang, Sichuan, China  | Modern cultivar | He et al. (2022)   |
| 251 | B | YNBS020 | MZ419820 | Baoshan, Yunnan, China    | Modern cultivar | He et al. (2022)   |
| 252 | D | YNBS021 | MZ419821 | Baoshan, Yunnan, China    | Modern cultivar | He et al. (2022)   |
| 253 | B | YNDH031 | MZ419822 | Dehongzhou, Yunnan, China | Modern cultivar | He et al. (2022)   |
| 254 | A | ZJWL001 | MZ419823 | Wenling, Zhejiang, China  | Modern cultivar | He et al. (2022)   |
| 255 | A | ZJWL002 | MZ419824 | Wenling, Zhejiang, China  | Modern cultivar | He et al. (2022)   |
| 256 | A | ZJWL005 | MZ419825 | Wenling, Zhejiang, China  | Modern cultivar | He et al. (2022)   |
| 257 | A | ZJWL035 | MZ419826 | Wenling, Zhejiang, China  | Modern cultivar | He et al. (2022)   |
| 258 | E | ZJWZ019 | MZ419827 | Wenzhou, Zhejiang, China  | Chewing cane    | He et al. (2022)   |
| 259 | A | ZJWZ020 | MZ419828 | Wenzhou, Zhejiang, China  | Chewing cane    | He et al. (2022)   |
| 260 | A | ZJWZ025 | MZ419829 | Wenzhou, Zhejiang, China  | Chewing cane    | He et al. (2022)   |
| 261 | A | ZJWZ026 | MZ419830 | Wenzhou, Zhejiang, China  | Chewing cane    | He et al. (2022)   |
| 262 | A | ZJYW001 | MZ419831 | Yiwu, Zhejiang, China     | Modern cultivar | He et al. (2022)   |
| 263 | A | ZJYW002 | MZ419832 | Yiwu, Zhejiang, China     | Modern cultivar | He et al. (2022)   |
| 264 | A | ZJYW006 | MZ419833 | Yiwu, Zhejiang, China     | Modern cultivar | He et al. (2022)   |
| 265 | D | ZJYW007 | MZ419834 | Yiwu, Zhejiang, China     | Modern cultivar | He et al. (2022)   |
| 266 | F | YN13    | FM997900 | Yunnan, China, China      | Chewing cane    | Wang et al. (2010) |
| 267 | F | YN12    | FM997899 | Yunnan, China, China      | Chewing cane    | Wang et al. (2010) |
| 268 | D | YN11    | FM997898 | Yunnan, China, China      | Chewing cane    | Wang et al. (2010) |
| 269 | B | YN16    | FM997903 | Yunnan, China, China      | Modern cultivar | Wang et al. (2010) |
| 270 | A | YN18    | FM997905 | Yunnan, China, China      | Modern cultivar | Wang et al. (2010) |
| 271 | B | YN14    | FM997901 | Yunnan, China, China      | Modern cultivar | Wang et al. (2010) |
| 272 | F | YN21    | FM997908 | Yunnan, China, China      | Modern cultivar | Wang et al. (2010) |
| 273 | F | YN22    | FM997909 | Yunnan, China, China      | Modern cultivar | Wang et al. (2010) |

|     |   |           |          |                        |                 |                     |
|-----|---|-----------|----------|------------------------|-----------------|---------------------|
| 274 | D | YN-lc-1   | KC179678 | Yunnan, China, China   | Modern cultivar | Zhang et al. (2015) |
| 275 | D | YN-lc-2   | KC179679 | Yunnan, China, China   | Modern cultivar | Zhang et al. (2015) |
| 276 | A | GD-gz-sh1 | DQ991392 | Guangdong, China       | Modern cultivar | Xu et al. (2008)    |
| 277 | A | GD-gz-sh2 | DQ991393 | Guangdong, China       | Modern cultivar | Xu et al. (2008)    |
| 278 | E | GD-gz-sh3 | DQ922903 | Guangdong, China       | Modern cultivar | Xu et al. (2008)    |
| 279 | E | GD-wy-sh1 | DQ227695 | Guangdong, China       | Modern cultivar | Xu et al. (2008)    |
| 280 | A | GD-wy-sh2 | EF583924 | Guangdong, China       | Modern cultivar | Xu et al. (2008)    |
| 281 | A | GD-bl-so  | DQ991390 | Guangdong, China       | Chewing cane    | Xu et al. (2008)    |
| 282 | A | GD-gz-so  | DQ991391 | Guangdong, China       | Chewing cane    | Xu et al. (2008)    |
| 283 | E | GX-nn-sh1 | EF419178 | Guangxi, China, China  | Modern cultivar | Xu et al. (2008)    |
| 284 | D | GX-nn-sh2 | EF419179 | Guangxi, China, China  | Modern cultivar | Xu et al. (2008)    |
| 285 | C | GX-nn-sh3 | EF419180 | Guangxi, China, China  | Modern cultivar | Xu et al. (2008)    |
| 286 | A | GX        | KJ541740 | Guangxi, China, China  | Modern cultivar | Zhou et al. (2014)  |
| 287 | B | GX-gl-10  | KC179677 | Guangxi, China, China  | Chewing cane    | Zhang et al. (2015) |
| 288 | D | HN-lg-1   | KC179638 | Hainan, China, China   | Modern cultivar | Zhang et al. (2015) |
| 289 | A | LH        | AJ310196 | Zhejiang, China, China | Modern cultivar | Chen et al. (2002)  |
| 290 | A | LP        | AJ310195 | Zhejiang, China, China | Modern cultivar | Chen et al. (2002)  |
| 291 | A | XgS       | AJ310194 | Zhejiang, China, China | Modern cultivar | Chen et al. (2002)  |
| 292 | A | XoS       | AJ310197 | Zhejiang, China, China | Modern cultivar | Chen et al. (2002)  |
| 293 | A | YH        | AJ310198 | Zhejiang, China, China | Modern cultivar | Chen et al. (2002)  |
| 294 | D | hz        | AJ421470 | Zhejiang, China, China | Modern cultivar | Chen et al. (2002)  |
| 295 | A | VN/SC5    | DQ925433 | Vietnam                | Chewing cane    | Ha et al. (2008)    |
| 296 | A | VN/SC6    | DQ925434 | Vietnam                | Chewing cane    | Ha et al. (2008)    |
| 297 | D | SCI       | U57359   | USA                    | Modern cultivar | Zhou et al. (2007)  |
| 298 | D | SCM       | U57360   | USA                    | Modern cultivar | Zhou et al. (2007)  |

|     |          |         |           |                 |                 |                       |
|-----|----------|---------|-----------|-----------------|-----------------|-----------------------|
| 299 | D        | SCH     | U07219    | USA             | Modern cultivar | Yang et al. (1997)    |
| 300 | D        | Louis   | EF078962  | USA             | Modern cultivar | Grisham et al. (2007) |
| 301 | D        | TUC-h1  | EU189035  | Argentina       | Modern cultivar | GenBank               |
| 302 | D        | TUC-m2  | EU189040  | Argentina       | Modern cultivar | GenBank               |
| 303 | D        | TUC-h3  | EU189037  | Argentina       | Modern cultivar | Perera et al. (2009)  |
| 304 | D        | TUC-m1  | EU189039  | Argentina       | Modern cultivar | Perera et al. (2009)  |
| 305 | D        | TUC-i2  | EU189042  | Argentina       | Modern cultivar | Perera et al. (2009)  |
| 306 | D        | H       | U57358    | USA             | Modern cultivar | Zhou et al. (2007)    |
| 307 | Outgroup | SCMV-HZ | NC_003398 | Zhejiang, China | Maize           | GenBank               |
